# Supplementary material
Source: PubMed Central journal article supplement (PMC3525020)
Supplement: supp_blood-2012-06-434639_blood-2012-06-434639-1.pdf [file supp_blood-2012-06-434639_blood-2012-06-434639-1.pdf]

**Supplemental Table 1**

| Patient # | IPSS Cytogenetic Risk Group Pre-Treatment | Best Response | Karyotype Post-Treatment | SNP-A Defects | Type Of SNP-A Defect | TET2                    | DNMT3A             | IDH1/2           | CBL | JAK2 | SF3B1 | U2AF1 | SRSF2          | NRAS | KRAS            | EZH2 | P53                 |
|-----------|-------------------------------------------|---------------|--------------------------|---------------|----------------------|-------------------------|--------------------|------------------|-----|------|-------|-------|----------------|------|-----------------|------|---------------------|
| 1         | Intermediate                              | CR            | Abnormal                 | Y             | Gain                 | c.4249,G>T p.Val1417Phe | WT                 | c.419G>A p.R140G | WT  | WT   | WT    | WT    | c.284 C>G P95R | WT   | WT              | WT   | WT                  |
| 2         | Intermediate                              | CR            | Abnormal                 | Y             | Gain                 | WT                      | WT                 | WT               | WT  | WT   | WT    | WT    | WT             | WT   | WT              | WT   | WT                  |
| 3         | Good                                      | HI-n          | Normal                   | N             | None                 | WT                      | WT                 | WT               | WT  | WT   | WT    | WT    | WT             | WT   | WT              | WT   | WT                  |
| 4         | Poor                                      | No response   | NA                       | N             | None                 | WT                      | WT                 | WT               | WT  | WT   | WT    | WT    | WT             | WT   | WT              | WT   | c.711, G>A p.M237 I |
| 5         | No growth                                 | CR            | No growth                | Y             | Loss                 | WT                      | WT                 | WT               | WT  | WT   | WT    | WT    | WT             | WT   | WT              | WT   | WT                  |
| 6         | Intermediate                              | CR            | Normal                   | Y             | Gain                 | WT                      | c.2645 G>A p.R882H | WT               | WT  | WT   | WT    | WT    | WT             | WT   | WT              | WT   | WT                  |
| 7         | Intermediate                              | CR            | Abnormal                 | Y             | Loss                 | WT                      | WT                 | WT               | WT  | WT   | WT    | WT    | WT             | WT   | WT              | WT   | WT                  |
| 8         | Good                                      | CR            | Normal                   | Y             | Gain                 | WT                      | WT                 | WT               | WT  | WT   | WT    | WT    | WT             | WT   | WT              | WT   | WT                  |
| 9         | Intermediate                              | CR            | Abnormal                 | Y             | Gain/ Loss/ UPD      | WT                      | c.2644 C>T p.882C  | c.394C>T p.R132C | WT  | WT   | WT    | WT    | WT             | WT   | c.35 G>A p.G12A | WT   | WT                  |
| 10        | Good                                      | CR            | Normal                   | N             | None                 | WT                      | WT                 | WT               | WT  | WT   | WT    | WT    | WT             | WT   | WT              | WT   | WT                  |
| 11        | Good                                      | CR            | Normal                   | N             | None                 | WT                      | WT                 | WT               | WT  | WT   | WT    | WT    | WT             | WT   | WT              | WT   | WT                  |
| 12        | Poor                                      | NR            | Abnormal                 | Y             | Gain/ loss           | WT                      | WT                 | WT               | WT  | WT   | WT    | WT    | WT             | WT   | WT              | WT   | WT                  |
| 13        | Good                                      | NR            | Normal                   | Y             | loss                 | WT                      | WT                 | WT               | WT  | WT   | WT    | WT    | WT             | WT   | WT              | WT   | WT                  |
| 14        | Intermediate                              | HI-n; HI-e    | Normal                   | Y             | loss                 | WT                      | WT                 | WT               | WT  | WT   | WT    | WT    | WT             | WT   | WT              | WT   | WT                  |
| 15        | Good                                      | NR            | Normal                   | NA            | NA                   | WT                      | WT                 | WT               | WT  | WT   | WT    | WT    | WT             | WT   | WT              | WT   | WT                  |
| 16        | Poor                                      | CR            | Abnormal                 | NA            | NA                   | c.4513 G>A* p.A1505 T   | WT                 | WT               | WT  | WT   | WT    | WT    | WT             | WT   | WT              | WT   | WT                  |
| 17        | Good                                      | CR            | Normal                   | NA            | NA                   | WT                      | WT                 | WT               | WT  | WT   | WT    | WT    | WT             | WT   | WT              | WT   | c.713 G>A C238Y     |
| 18        | Poor                                      | NR            | Abnormal                 | NA            | NA                   | WT                      | WT                 | WT               | WT  | WT   | WT    | WT    | WT             | WT   | WT              | WT   | WT                  |
| 19        | Good                                      | CR            | Normal                   | NA            | NA                   | WT                      | WT                 | WT               | WT  | WT   | WT    | WT    | WT             | WT   | WT              | WT   | WT                  |

NA, Not Available; CR, Complete Response; NR, Not Response; H.I. Hematological Improvement; WT, Wild Type; SNP-A Defect, Y=YES, N=NO, UPD, Uniparental Disomy, NA, Not available

\*This Mutation has not been reported. It has not been confirmed based on no availability of cells.

**Supplemental Table 2**

| Patient | Karyotype by MC Pre-Treatment  | Best Response | Karyotype by MC Post-Treatment | SNP-A Defects                                                                                                                                                                                                                                                                                                                                                                                                                                    |
|---------|--------------------------------|---------------|--------------------------------|--------------------------------------------------------------------------------------------------------------------------------------------------------------------------------------------------------------------------------------------------------------------------------------------------------------------------------------------------------------------------------------------------------------------------------------------------|
| 1       | 46,X,i(X)(p10)[2]/46,XX[cp18]. | CR            | 46,XX[cp20]                    | 1p36.13p36.13,<br>3p21.31p21.31,<br>3q21.3q21.3,<br>4p16.1p16.1,<br>7p22.2p22.2,<br>7p15.1p15.1,<br>8q24.3q24.3,<br>9q33.2q33.2,<br>9q34.11q34.11,<br>9q34.2q34.2,<br>10q22.3q22.3,<br>10q24.33q24.33,<br>11p15.5p15.4 ,<br>12q24.11q24.11,<br>12q24.31q24.31,<br>14q32.12q32.12,<br>14q32.33q32.33,<br>16p13.3p13.3,<br>16q22.1q22.1,<br>17p13.1p13.1,<br>17q21.33q21.33,<br>17q23.2q23.2,<br>17q25.2q25.3,<br>19p13.3q13.33,<br>22q11.22q13.31 |
| 2       | 47,XX,+8[20]                   | CR            | 47,XX,+8[20]                   | 8p23.1-q24.3, 19p12-12                                                                                                                                                                                                                                                                                                                                                                                                                           |
| 3       | 46,XY[20]                      | HI-n          | 46,XY[20]                      | -                                                                                                                                                                                                                                                                                                                                                                                                                                                |

|    |                                                                                                                |    |                                                                                                            |                                                                                                                            |
|----|----------------------------------------------------------------------------------------------------------------|----|------------------------------------------------------------------------------------------------------------|----------------------------------------------------------------------------------------------------------------------------|
| 4  | 88-89<4n>,XXXX,ins(4:?)(q12;?)x2,-5,-5,-7,-7,der(8)t(7;8)(q11.2;q24)x2,-13,-13,-19,-19,+3-5mar[cp5]/46,XX[17]. | NR | NA                                                                                                         | -                                                                                                                          |
| 5  | No growth                                                                                                      | CR | No growth                                                                                                  | 3q13.31-q13.31                                                                                                             |
| 6  | 47,XY,+8[18]/46,XY[2]                                                                                          | CR | 46,XY[16]                                                                                                  | 8p23.3-q24.3, 9p13.1-q12                                                                                                   |
| 7  | 46,XY,del(3)(q13.1q24)[cp11]/46,XY[1].                                                                         | CR | 46,XY,del(3)(q13.1q24)[3]/45,sl,-20(5)/46,sl,der(7)t(1;7)(q21;p13)[cp4]/46,sl,add(17)(p11.2)[cp7]/46,XY[1] | 1p36.11p36.11, 17q23.2q23.2                                                                                                |
| 8  | 46,XY[20]                                                                                                      | CR | 46,XY[6].                                                                                                  | 4q13.2                                                                                                                     |
| 9  | 46,XY,del(5)(q3?1q3?5)[2]/46,XY[cp18]; FISH studies showed Trisomy 8                                           | CR | 47,XY,+8[9]                                                                                                | 4p13-p12, 4p12-p12 (Gain); 4q25-q25, 5q31.2-q31.2, 13q14.3-q14.3, 13q21.33-q21.33 (Loss); 6p25.3-p22.1, 8q24.3-q24.3 (UPD) |
| 10 | 46,XY[20]                                                                                                      | CR | 46,XY[20]                                                                                                  | -                                                                                                                          |
| 11 | 46,XY[20]                                                                                                      | CR | 46,XY[20]                                                                                                  | -                                                                                                                          |

|           |                                                                                           |                   |                                                                                                                                                     |                                                                                                                                                                                                                                                                                                                                               |
|-----------|-------------------------------------------------------------------------------------------|-------------------|-----------------------------------------------------------------------------------------------------------------------------------------------------|-----------------------------------------------------------------------------------------------------------------------------------------------------------------------------------------------------------------------------------------------------------------------------------------------------------------------------------------------|
| <b>12</b> | 44,X,-Y,del(5)(q22q35),-7,add(10)(q26),-16,-20,+mar1,+r[10]/45,sl,+ace[5]/44,sdl1,-18[5]. | <b>NR</b>         | 44,X,-Y,del(5)(q22q35),-7,add(10)(q26),i(11)(q10),-16,-18,-20,+r,+mar1,+ace[cp16]/44,X,-Y,dup(5)(q13q35), del(8)(p23),-15,-20,+r,+ace[cp3]/46,XY[1] | 13q31.1-q31.1, 20p12.3-p11.21 (Gain); 5p15q33.3 (small), 7p22.3q36.3, 16p13.3q24.3, 20q11.23q13.33 (loss)                                                                                                                                                                                                                                     |
| <b>13</b> | 46,XY[20]                                                                                 | <b>NR</b>         | 46,XY[20]                                                                                                                                           | 20p12.1, 6p12.3                                                                                                                                                                                                                                                                                                                               |
| <b>14</b> | 45, -17 [4]/ 46, XX[16]                                                                   | <b>HI-n; HI-e</b> | 46,XX[20]                                                                                                                                           | 1p32.3-1p32.3, 1q32.1-q32.1, 3p21.31-p21.31, 3q13.33-q13.33, 4p16.3-p16.3, 4p12-p12, 4q13.3-q13.3, 4q24-q24, 4q31.3-q31.3, 5q12.1-q12.1, 5q23.3q23.3, 6q22.32-q22.32, 6q25.1q25.1, 9q33.3-q33.3, 12q24.11-q24.11, 13q14.3-q14.3, 13q22.3-q22.3, 14q22.1-q22.1, 15q25.2-q25.2, 17q23.2-q23.2, 19p13.13p13.13, 22q13.31-q13.31, 22q13.33-q13.33 |
| <b>15</b> | 46,XY[20]                                                                                 | <b>NR</b>         | 46,XY[20]                                                                                                                                           | NA                                                                                                                                                                                                                                                                                                                                            |
| <b>16</b> | 45,XX,-7[7]/46,XX[13]                                                                     | <b>CR</b>         | 45,XX,-7[7]//46,XY[4]                                                                                                                               | NA                                                                                                                                                                                                                                                                                                                                            |
| <b>17</b> | 46,XY[20]                                                                                 | <b>CR</b>         | 46,XY[20]                                                                                                                                           | NA                                                                                                                                                                                                                                                                                                                                            |

|           |                                                                                                                             |           |                                                                                                                                     |    |
|-----------|-----------------------------------------------------------------------------------------------------------------------------|-----------|-------------------------------------------------------------------------------------------------------------------------------------|----|
| <b>18</b> | 45-46,XX,add(4)(q21),psu<br>dic(5;?)(q11.1;?),add(8)(p23),-13,-<br>16,add(17)(p11.2),-<br>18,+r,+mar1,+mar2[cp18]/46,XX[2]. | <b>NR</b> | 45-46,XX,add(4)(q21),-5[3],psu<br>dic(5;?)(q11.1;?)[16],add(8)(p23),-<br>13[17], -16,add(17)(p11.2),-<br>18,+r[5],+mar1,+mar2[cp20] | NA |
| <b>19</b> | 46,XY[20]                                                                                                                   | <b>CR</b> | 46,XY[20]                                                                                                                           | NA |

CR; Complete Response, NR; No Response. HI; Hematological Improvement,
